# Supplementary material for: Investigations into the Pd-catalysed cross-coupling of phenylacetylene with aryl chlorides: simple one-pot procedure and the effect of ZnCl2 co-catalysisElectronic supplementary information (ESI) available: general experimental, procedure for cross-coupling experiments and characterization data for products. See http://www.rsc.org/suppdata/cc/b2/b200453b/
Source: Royal Society of Chemistry journal article supplement (doi:10.1039/b200453b), 2002-03-21
Supplement: b200453b.doc [file b200453b.doc]

**Supplementary Material (ESI) for Chemical Communications**

**This journal is © The Royal Society of Chemistry 2002**

**Investigations into the Pd-catalysed cross-coupling of phenylacetylene with aryl chlorides: Simple one-pot procedure and the effect of ZnCl2 co-catalysis**

Michael R. Eberhard,* Zhaohui Wang and Craig M. Jensen

*Department of Chemistry, University of Hawaii, Honolulu, Hawaii 96822, USA.*

# Supporting Information

# I. General

1,4-Dioxane (99.8%, anhydrous, Aldrich) was used as purchased. Toluene and tetrahydrofuran were distilled from potassium benzophenone under nitrogen. Triethylamine and piperidine were freeze-thawed three times prior to use. Phenylacetylene was distilled prior to use, freeze-thawed three times and stored under an argon atmosphere. Chlorobenzene, 4-chloroanisole (Aldrich), 4-chloroacetophenone (Aldrich), 3-fluoro-chlorobenzene (Aldrich), 4-fluoro-chlorobenzene (Aldrich), *o*-dichlorobenzene (Fisher Scientific), *m*-dichlorobenzene (Aldrich), 2-chlorotoluene (Aldrich), 3-chlorotoluene (Mattheson, Coleman and Bell), 4-chlorotoluene (Aldrich) and 4-chlorobenzaldehyde (Aldrich) were freeze-thawed three times and stored under an argon atmosphere prior to use. *p*-Dichlorobenzene (MCB Reagents), 2-chloro-4-nitrotoluene, 1-chloro-4-nitrobenzene were used as purchased. FeCl3 (99.99%, anhydrous, Aldrich) and CuI (Aldrich) were stored under argon and used as purchased. ZnCl2 was dried at 300 °C under vacuum and stored under argon. Cs2CO3 (Aldrich), CsOAc (Aldrich), Na2CO3 (Fisher Scientific), K2CO3 (Fisher Scientific), NaHCO3 (Fisher Scientific) were used as purchased.

Complex **1** was prepared according to the published procedure.1

Identity and purity of the products was established by gas chromatography with a gas chromatograph GC HP 5980A with flame ionization detector (FID), equipped with a HP-1 capillary column (25 m) from Hewlett Packard, by gas chromatography with a gas chromatograph GC HP 5890 Series II with a mass selective detector HP 5971 (GC-MS), equipped with a HP-1MS capillary column (30 m) from Hewlett Packard, and by NMR spectroscopy on a Varian Unity Inova 400 spectrometer.

# II. Procedure for the cross-coupling experiments

**Procedure A (Table 1).** Under an atmosphere of argon, base **B** (0.7 mmol), additive **A** (0.05 mmol or 0.5 mmol respectively) and **1** (0.025 mmol) were mixed in a Schlenk tube equipped with a stir bar. 1,4-Dioxane (1 cm3) was added, followed by phenylacetylene (0.5 mmol), aryl chloride (2.5 mmol), undecane (0.12 mmol) and again 1,4-dioxane (1 cm3). The tube was sealed and immersed in a silicon oil bath at 160 °C for 24 h. The reaction mixture was then cooled to room temperature and the organic phase was analyzed by gas chromatography (GC/FID, GC-MS). For the determination of isolated yields the organic phases of three runs were combined, concentrated in vacuum and the residue was purified by column chromatography or recrystallisation.

**Diphenylacetylene (Table 1, entry 11)).** Column chromatography with hexane gave 0.054 g (61 %) of the desired product as a solid.

1H NMR (CD2Cl2): δ 7.56-7.53 (m, 4H), 7.40-7.35 (m, 6H).

13C NMR (CD2Cl2): δ 131.9, 128.8, 128.7, 123.6, 89.6.

**4-(Phenylethinyl)toluene (Table 1, entry 13)).** Column chromatography with hexane gave 0.079 g (82 %) of the desired product.

1H NMR (CD2Cl2): δ 7.56-7.53 (m, 2H), 7.45 (AB, 2H), 7.41-7.35 (m, 3H), 7.20 (AB, 2H), 2.39 (s, 3H).

13C NMR (CD2Cl2): 139.1, 131.82, 131.78, 129.5, 128.8, 128.5, 123.8, 120.4, 89.8, 88.9, 21.6.

**3-(Phenylethinyl)toluene (Table 1, entry 14)).** Column chromatography with hexane gave 0.068 g (71 %) of the desired product.

1H NMR (CD2Cl2): δ 7.57-7.52 (m, 2H), 7.40-7.32 (m, 5H), 7.27-7.24 (m, 1H), 7.19-7.17 (m, 1H), 2.38 (s, 3H).

13C NMR (CD2Cl2): δ 138.7, 132.4, 131.9, 129.6, 128.9, 128.8, 128.6, 123.7, 123.3, 89.8, 89.2, 21.3.

**2-(Phenylethinyl)toluene (Table 1, entry 15).** Column chromatography with hexane gave 0.065 g (68 %) of the desired product.

1H NMR (CD2Cl2): δ 7.58-7.54 (m, 2H), 7.51 (m, 1H), 7.41-7.35 (m, 3H), 7.28-7.26 (m, 2H), 7.23-7.18 (m, 1H), 2.54 (s, 3H).

13C NMR (CD2Cl2): δ 140.6, 132.1, 131.8, 129.9, 128.8, 128.7, 128.6, 126.0, 123.8, 123.3, 93.6, 88.6, 20.8.

**1-Fluoro-3-(phenylethinyl)benzene (Table 1, entry 17).** Column chromatography with hexane gave 0.035 g (36 %) of the desired product as a creamy solid.

1H NMR (CD2Cl2): δ 7.57-7.53 (m, 2H), 7.39-7.33 (m, 5H), 7.26-7.23 (m, 1H), 7.10-7.05 (m, 1H).

13C NMR (CD2Cl2): δ 162.8 (d, 1*J*(C, F) 244 Hz), 132.0, 130.5 (d, 3*J*(C, F) 9 Hz), 129.0, 128.8, 127.9 (d, 4*J*(C, F) 3 Hz), 125.5 (d, 3*J*(C, F) 10 Hz), 123.1, 118.5 (d, 2*J*(C, F) 22 Hz), 115.9 (d, 2*J*(C, F) 21 Hz), 90.5, 88.3 (d, 4*J*(C, F) 3 Hz).

**1-Fluoro-4-(phenylethinyl)benzene (Table 1, entry 16).** Column chromatography with hexane gave 0.049 g (50 %) of the desired product as a creamy solid.

1H NMR (CD2Cl2): δ 7.56-7.51 (m, 4H), 7.39-7.35 (m, 3H), 7.08 (m, 2H).

13C NMR (CD2Cl2): δ 162.9 (d, 1*J*(C, F) 248 Hz), 133.8 (d, 3*J*(C, F) 8 Hz), 131.8, 128.8, 123.4, 119.7, 115.9 (d, 2*J*(C, F) 22 Hz), 89.2, 88.4 (only seven aromatic carbons detected, probably due to overlap of signals).

**1-Chloro-4-(phenylethinyl)benzene (Table 1, entry 18).** Column chromatography with hexane gave 0.085 g (80 %) of the desired product as colorless oil.

1H NMR (CD2Cl2): δ 7.56-7.34 (m, 9H).

13C NMR (CD2Cl2): δ 134.6, 133.2, 131.9, 129.1, 129.0, 128.8, 123.3, 122.3, 90.6, 88.5.

**1-Chloro-3-(Phenylethinyl)benzene (Table 1, entry 19).** Column chromatography with hexane gave 0.020 g (19 %) of the desired product as colorless oil.

1H NMR (CD2Cl2): δ 7.57-7.30 (m, 9H).

13C NMR (CD2Cl2): δ 134.5, 132.0, 131.7, 130.1, 129.1, 128.9, 128.8, 125.4, 123.1, 90.8, 88.1 (only nine aromatic carbons detected, probably due to overlap of signals).

**1-Chloro-2-(phenylethinyl)benzene (Table 1, entry 20).** Column chromatography with hexane gave 0.038 g (36 %) of the desired product as colorless oil.

1H NMR (CD2Cl2): δ 7.61-7.58 (m, 3H), 7.48-7.45 (m, 1H), 7.41-7.37 (m, 3H), 7.33-7.26 (m, 2H).

13C NMR (CD2Cl2): δ 136.0 133.6, 132.0, 129.8, 129.6, 129.1, 128.8, 127.0, 123.4, 123.1, 94.7, 86.4.

**Procedure B (Table 1).** Under an atmosphere of argon, base **B** (1.4 mmol), additive **A** (0.1 mmol or 1 mmol respectively) and **1** (0.05 mmol) were mixed in a Schlenk tube equipped with a stir bar. 1,4-Dioxane (2 cm3) was added, followed by phenylacetylene (1 mmol), aryl chloride (5 mmol), undecane (0.12 mmol) and again 1,4-dioxane (2 cm3). The tube was sealed and immersed in a silicon oil bath at 160 °C for 24 h. The reaction mixture was then cooled to room temperature and the organic phase was analyzed by gas chromatography (GC/FID, GC-MS). For the determination of isolated yields the organic phase was concentrated in vacuum and the residue was purified by column chromatography.

**4-(Phenylethinyl)anisole (Table 1, entry 12).** Column chromatography with hexane gave 0.135 g (65 %) of the desired product as a solid.

1H NMR (CD2Cl2): δ 7.53-7.47 (m, 4H), 7.39-7.32 (m, 3H), 6.90 (AB, 2H), 3.82 (s, 3H).

13C NMR (CD2Cl2): δ 160.2, 133.3, 131.7, 128.7, 128.4, 124.0, 115.6, 114.4, 89.6, 88.3, 55.7.

**4-Nitro-2-(phenylethinyl)toluene (Table 1, entry 22).** Column chromatography with hexane gave 0.145 g (61 %) of the desired product.

1H NMR (CD2Cl2): δ 8.11 (m, 1H) 7.67-7.64 (m, 2H), 7.57-7.54 (m, 2H), 7.40-7.36 (m, 3H), 2.60 (s, 3H).

13C NMR (CD2Cl2): δ 149.5, 135.9, 134.0, 133.3, 132.0, 129.2, 128.9, 127.7, 122.8, 122.7, 91.2, 87.2, 20.5.

**4-(Phenylethinyl)benzaldehyde (Table 1, entry 21).** Column chromatography with hexane gave 0.083 g (40 %) of the desired product.

1H NMR (CD2Cl2): δ 10.01 (s, 1H), 7.87 (AB, 2H), 7.69 (m, 2H), 7.59-7.57 (m, 2H), 7.40 (m, 3H).

13C NMR (CD2Cl2): δ 191.6, 136.0, 132.4, 132.1, 129.8, 129.7, 129.4, 128.9, 122.9, 93.5, 88.8.

**4-(Phenylethinyl)acetophenone (Table 1, entry 23).** Under an atmosphere of argon, Cs2CO3 (1.4 mmol), ZnCl2 (0.1 mmol) and **1** (0.05 mmol) were mixed in a Schlenk tube equipped with a stir bar. 1,4-Dioxane (2 cm3) was added, followed by phenylacetylene (2 mmol), aryl chloride (1 mmol), undecane (0.12 mmol) and again 1,4-dioxane (2 cm3). The tube was sealed and immersed in a silicon oil bath at 160 °C for 24 h. The reaction mixture was then cooled to room temperature and the organic phase was analyzed by gas chromatography (GC/FID, GC-MS). For the determination of isolated yield the organic phase was concentrated in vacuum and the residue was recrystallised from 95% ethanol to give 0.201 g (91 %) of the desired product as a solid.

1H NMR (CD2Cl2): δ 7.94 (AB, 2H), 7.63 (AB, 2H), 7.58-7.55 (m, 2H), 7.40-7.37 (m, 3H), 2.59 (s, 3H).

13C NMR (CD2Cl2): δ 197.4, 136.7, 132.02, 131.98, 129.2, 128.9, 128.6, 128.3, 124.0, 92.7, 88.8, 26.8.

# III. References

1. D. Morales-Morales, R. Redón, C. Yung and C. M. Jensen, *Chem. Commun.*, 2000,

1619.
